# Supplementary material
Source: Springer Nature journal article supplement (https://www.springermedizin.de/resource/supplementary/12906_2011_526_MOESM1_ESM.pdf/9519942)
Supplement: MOESM1 [file 9519942]

***Bryophyllum pinnata* (20 kg fresh leaves)**

**Homogenized with 2 L of water**

**Residue**

**Aqueous phase**

**shaken with chloroform**

**Chloroform extract (A)**

**Chloroform extract (B)**

**Aqueous phase**

**Crude extract (C)  
(Oily residue)**

**Silica Gel Column  
Chromatography  
(5\*40cm)**

**Pet Eth (100%)  
(F1)**

**Pet Eth : Eth Acet (75:25)  
(F3)**

**Eth Acet (100%)  
(F5)**

**Pet Eth : Eth Acet (95:5)  
(F2)**

**Pet Eth : Eth Acet (50:50)  
(F4)**

**Meth(100%)  
(F6)**
